# Supplementary material
Source: publisher site journal article supplement (http://www.degruyter.com/publication/journal_key/WGST/downloadAsset/WGST_Peer%20Review%20Policy.pdf)
Supplement: Supplementary file [file WGST_Peer%20Review%20Policy.pdf]

## *Wittgenstein-Studien* – Peer Review Policy

The annual *Wittgenstein-Studien. Internationales Jahrbuch für Wittgenstein-Forschung / International yearbook for Wittgenstein research* is based on a single-blind peer review process:

### *Submission*

*Wittgenstein-Studien* publishes independent article submissions and, in some cases, thematic special sections. Articles for the non-thematic part as well as contributions for other sections (book reviews, conference reports) are submitted usually on the initiative of the respective authors. Submissions are encouraged by calls for papers on the internet and by announcements via scientific mailing lists. Articles for thematic special sections are invited by guest editors commissioned by the board of editors. Successfully passing an audit process is mandatory for all submissions which are peer-reviewed as described below. First, the editor-in-chief checks whether the submitted article fits into the program of the *Wittgenstein-Studien* and whether it has the required scientific quality in terms of form and language. If the editor-in-chief her- or himself is the author of the submitted manuscript or has any other competing interest regarding a specific manuscript, this examination will be passed on to a non-biased member of the editorial board. If the contribution is acceptable for publication in *Wittgenstein-Studien*, the peer review will be initiated.

### *Review*

Each paper is sent for review to two members of the scientific advisory board who have expertise in the subject of the submitted article. The reviewers will be asked in advance whether there are any reasons for bias on the part of the reviewer. If the submitting person is a member of the scientific advisory board or the editorial board, strict care will be taken to ensure that there is no close relationship with the reviewing person by asking either members of the scientific advisory board or the editorial board who are not affiliated with the author or the author's institution, or external experts to provide a review.

The content and form of all submitted articles for the thematic and non-thematic sections are single-blind peer reviewed by usually two referees, i.e., reviewers are aware of the identity of the author(s), but author(s) are unaware of the identity of the reviewer(s). If the specific thematic focus of a contribution makes it necessary, independent experts may also be asked to provide their expertise. The peer review of the articles takes approximately six to eight weeks.

If the paper is positively reviewed without requests for revision, the editor-in-chief checks the coherence and objectivity of the reviews. If this is the case, the article is accepted for publication.

suggestions and queries must be taken into consideration and the author must document his or her reactions to them. The reviewers will check the revision. The final decision on the publication of a contribution will be taken by the editor-in-chief (or, in case of bias of the editor-in-chief, by a non-biased member of the editorial board) on the basis of the reviews.
